# Supplementary material for: Diazaspiro-iminosugars and polyhydroxylated spiro-bislactams: synthesis, glycosidase inhibition and molecular docking studies
Source: Royal Society of Chemistry journal article supplement (doi:10.1039/c5ra09584k), 2015-01-01
Supplement: c5ra09584k1.pdf [file c5ra09584k1.pdf]

## Supporting Information

### **“Diazaspiro-iminosugars and Polyhydroxylated Spiro-bislactams: Synthesis, Glycosidase Inhibitory and Molecular Docking Studies”**

Vijay Singh Parihar<sup>a</sup>, Nitin J. Pawar<sup>a</sup>, Sougata Ghosh<sup>b</sup>, Balu A. Chopade<sup>b</sup>, Navanath Kumbhar<sup>a</sup>  
and Dilip D. Dhavale<sup>a\*</sup>

<sup>a</sup>*Department of Chemistry, Garware Research Centre, Savitribai Phule Pune University, Pune -  
411 007, India*

<sup>b</sup>*Department of Microbiology, Savitribai Phule Pune University, Pune - 411 007, India*

*ddd@chem.unipune.ac.in*

### **INDEX**

| Sr. No. | Content                                                                                                                | Page no. |
|---------|------------------------------------------------------------------------------------------------------------------------|----------|
| 1       | <sup>1</sup> H and <sup>13</sup> C NMR spectrum for compounds <b>6, 7, 8, 9, 10, 11, 12, 1, 13, 14, 15, 2, 3 and 4</b> | 2-15     |

# 1. Spectra of new compounds ( $^1\text{H}$ -NMR and $^{13}\text{C}$ -NMR)

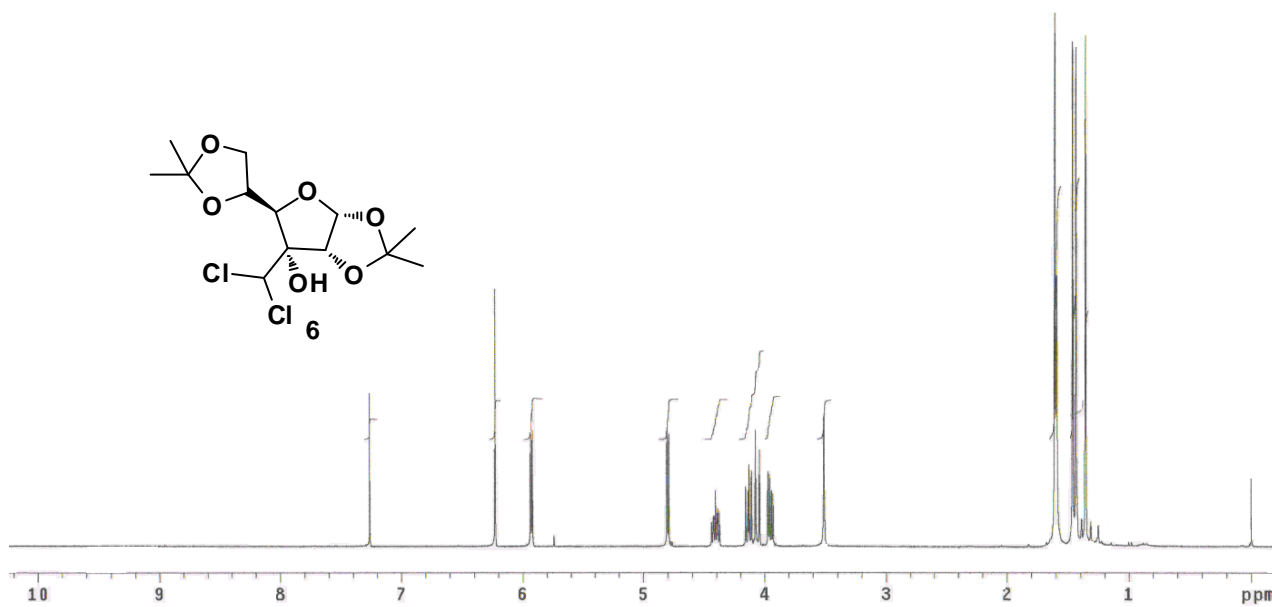

Figure 1:  $^1\text{H}$  NMR (300 MHz,  $\text{CDCl}_3$  Spectrum of compound **6**)

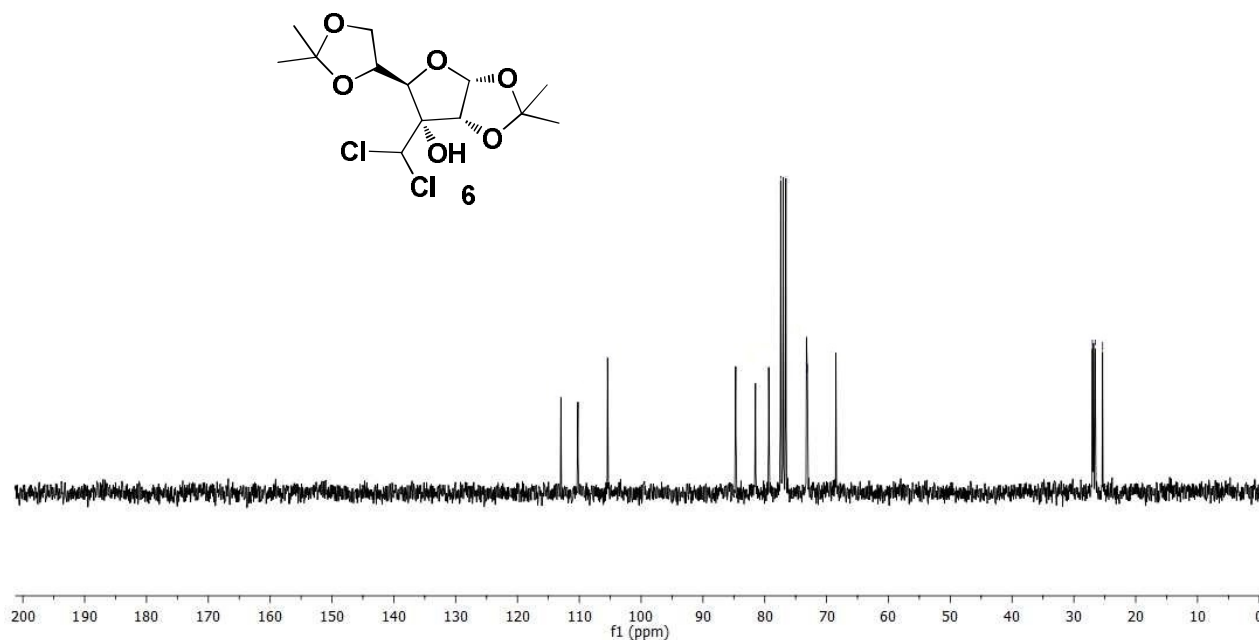

Figure 2:  $^{13}\text{C}$  NMR (300 MHz,  $\text{CDCl}_3$  Spectrum of compound **6**)

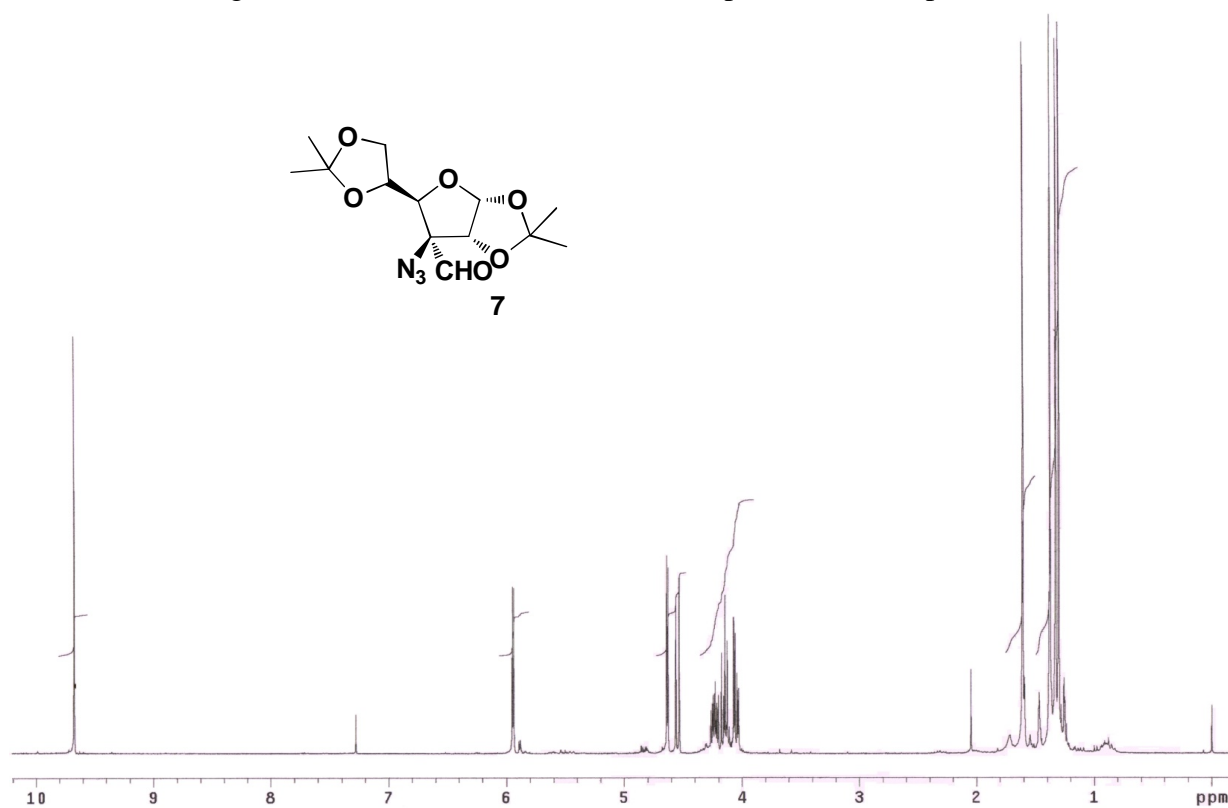

Figure 3:  $^1\text{H}$  NMR (300 MHz,  $\text{CDCl}_3$  Spectrum of compound **7**)

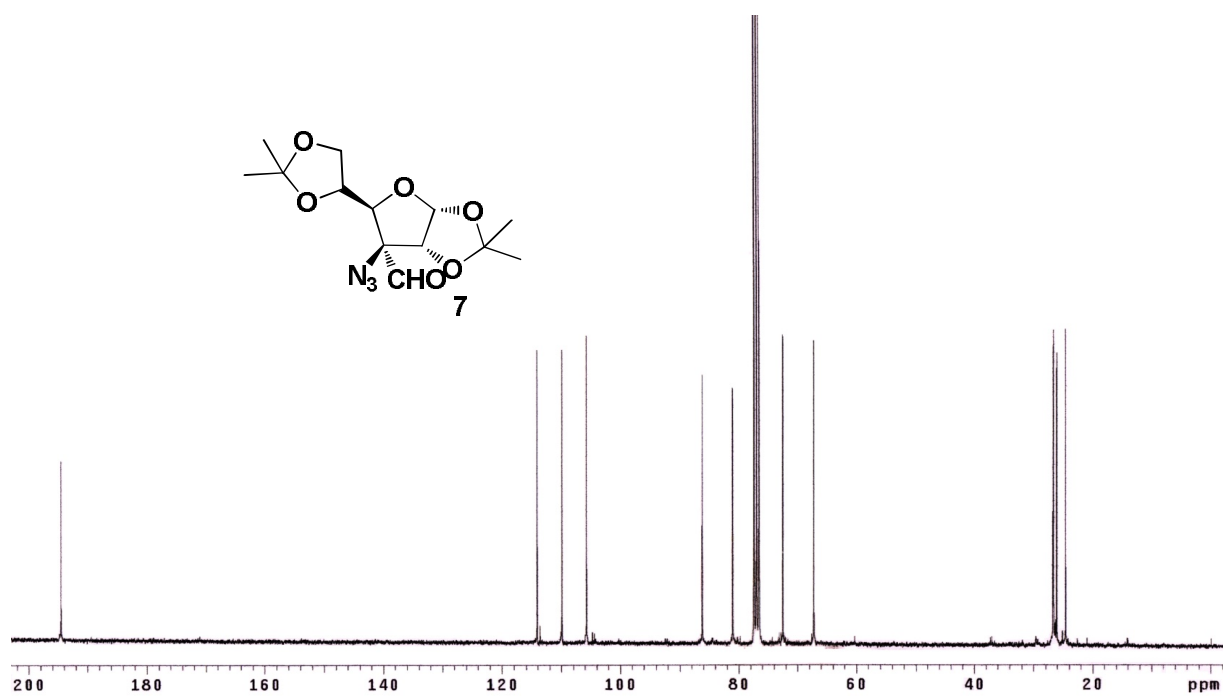

Figure 4:  $^{13}\text{C}$  NMR (300 MHz,  $\text{CDCl}_3$  Spectrum of compound **7**)

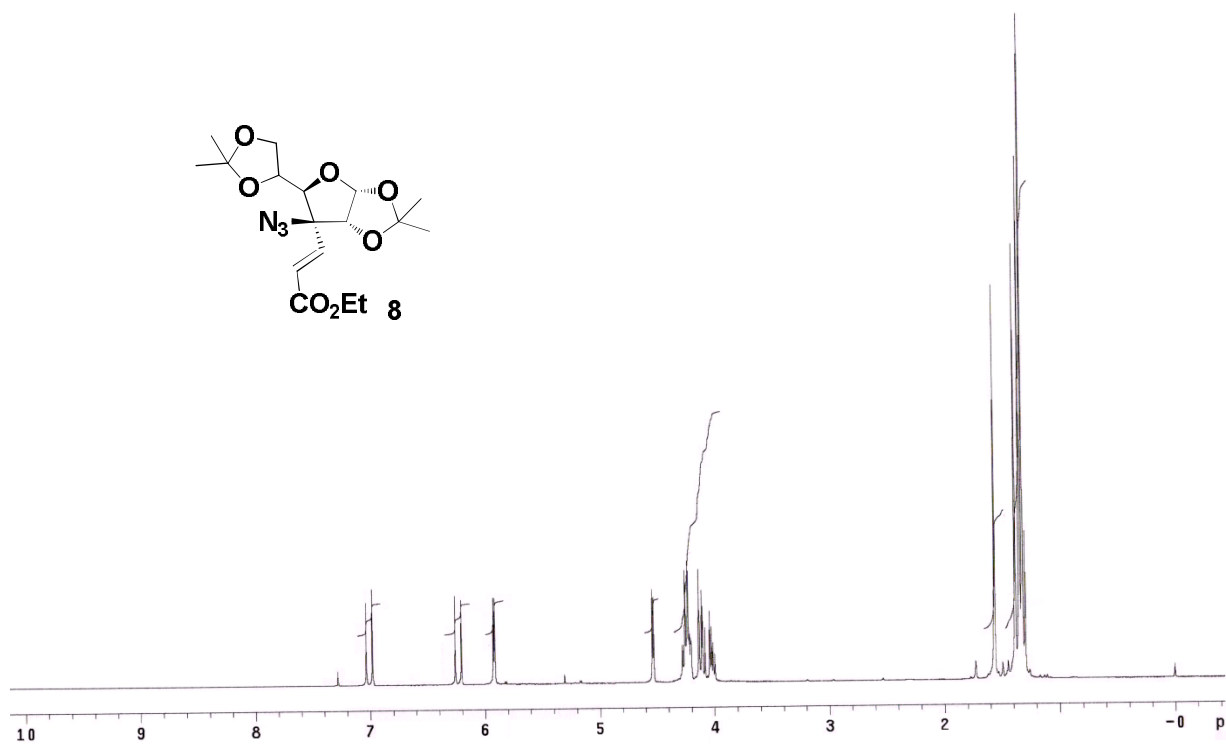

Figure 5: <sup>1</sup>H NMR (300 MHz, CDCl<sub>3</sub> Spectrum of compound **8**)

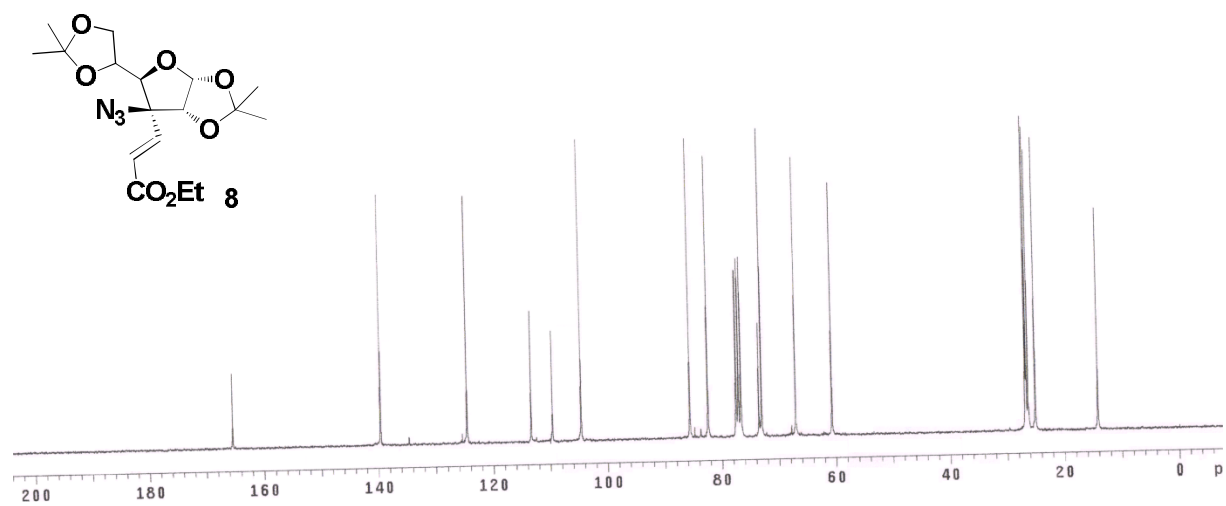

Figure 6: <sup>13</sup>C NMR (300 MHz, CDCl<sub>3</sub> Spectrum of compound **8**)

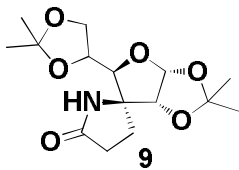

Chemical structure of compound **9** is shown above the spectrum. The structure is a complex bicyclic molecule featuring a central five-membered ring with a nitrogen atom (HN) and a carbonyl group (C=O). It is substituted with two acetonide groups and a methyl group. The spectrum displays several sharp peaks in the aromatic region (6.5-8.5 ppm), a cluster of peaks between 4.0 and 5.5 ppm, and a large peak at approximately 1.2 ppm, likely corresponding to the methyl group. A small peak is visible at approximately 180 ppm, characteristic of a carbonyl group.

Figure 8:  $^{13}\text{C}$  NMR (300 MHz,  $\text{CDCl}_3$ ) Spectrum of compound **9**)

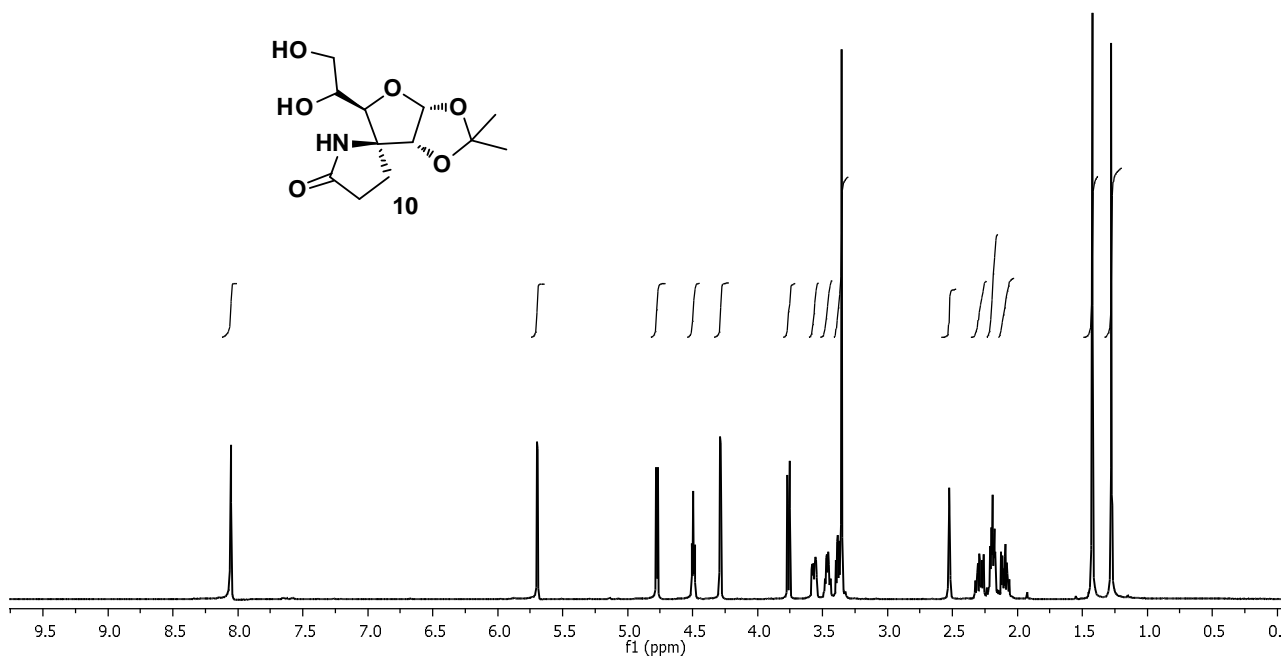

Figure 9: <sup>1</sup>H NMR (500 MHz, DMSO Spectrum of compound **10**)

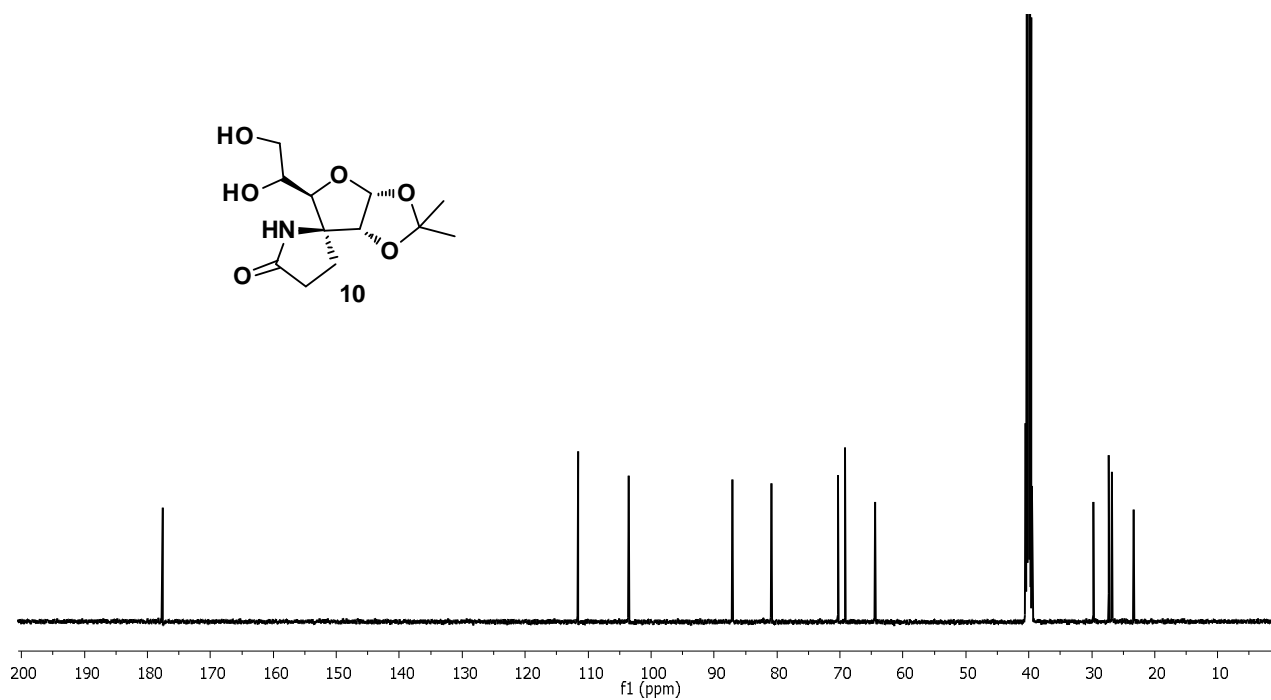

Figure 10: <sup>13</sup>C NMR (125 MHz, DMSO Spectrum of compound **10**)

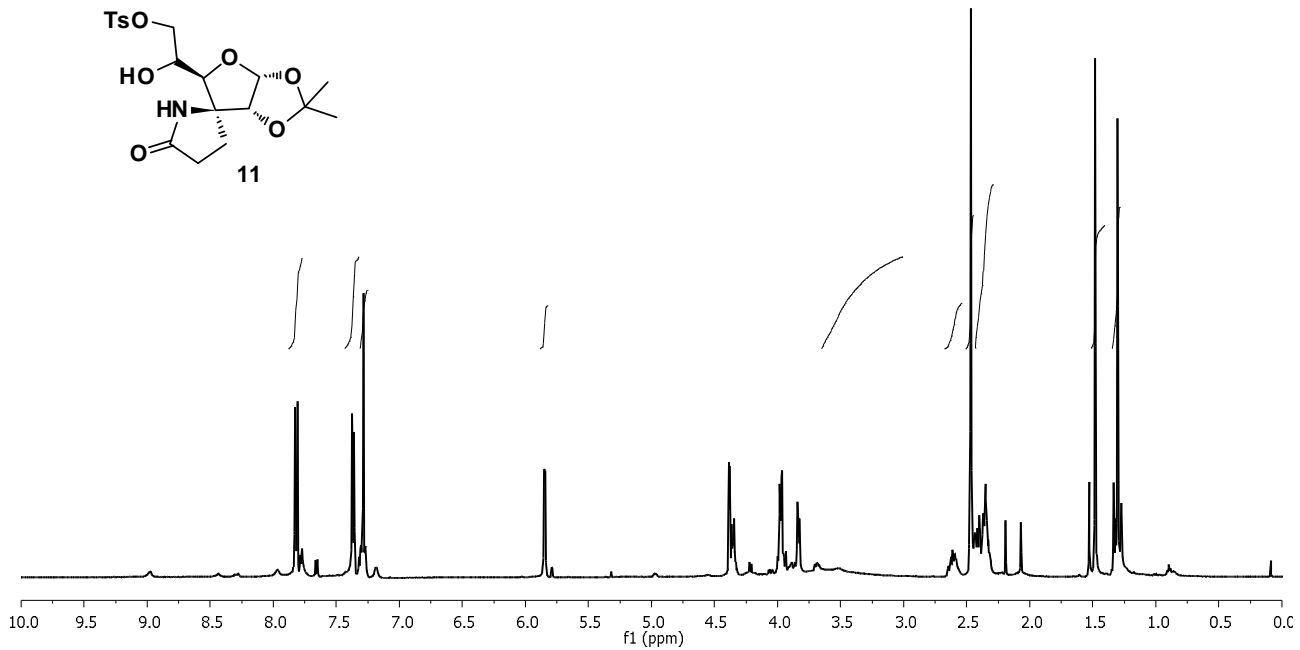

Figure 11: <sup>1</sup>H NMR (500 MHz, CDCl<sub>3</sub> Spectrum of compound **11**)

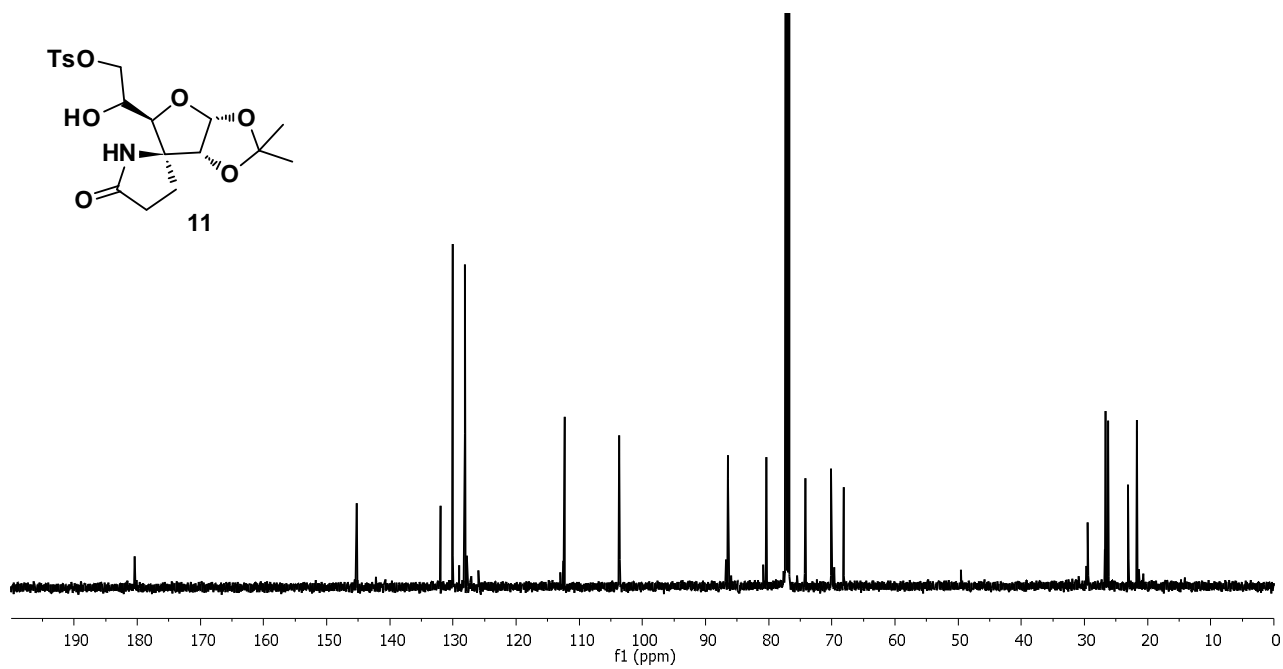

Figure 12: <sup>13</sup>C NMR (125 MHz, CDCl<sub>3</sub> Spectrum of compound **11**)

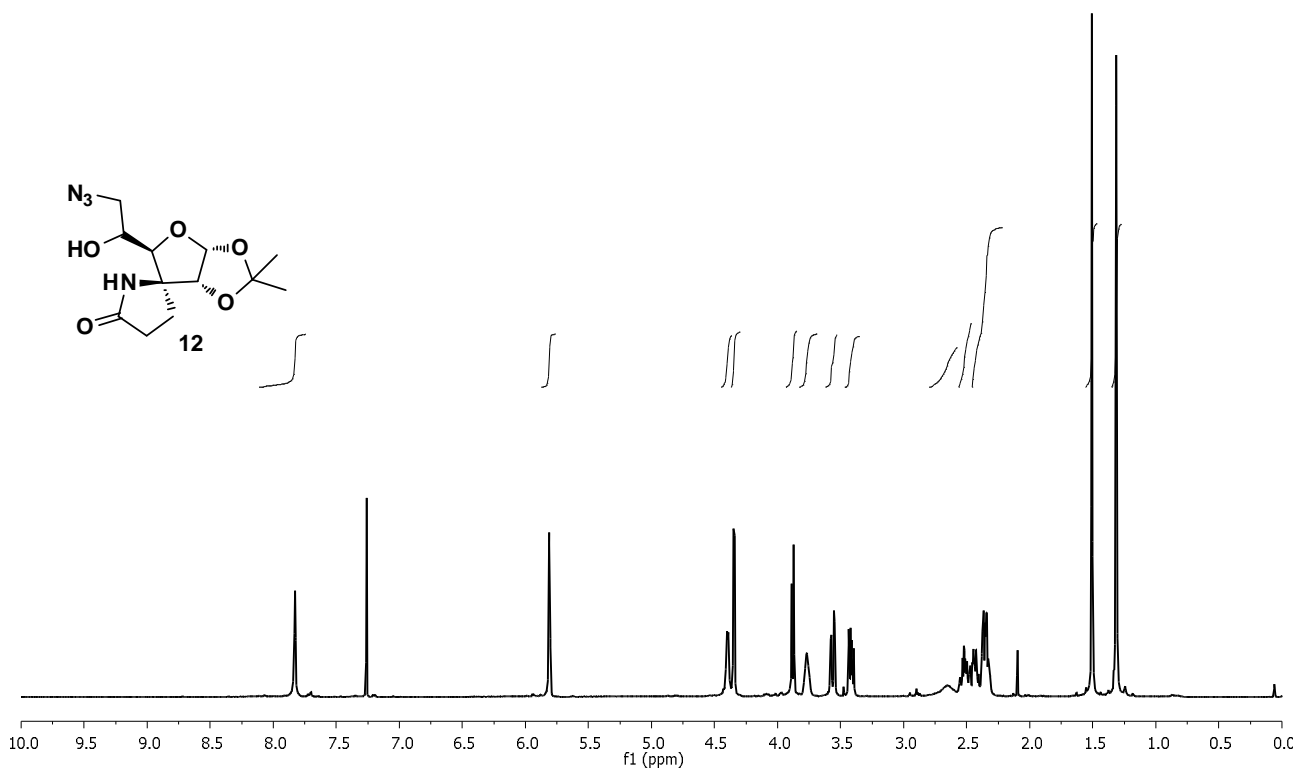

Figure 13: <sup>1</sup>H NMR (500 MHz, CDCl<sub>3</sub>) Spectrum of compound **12**

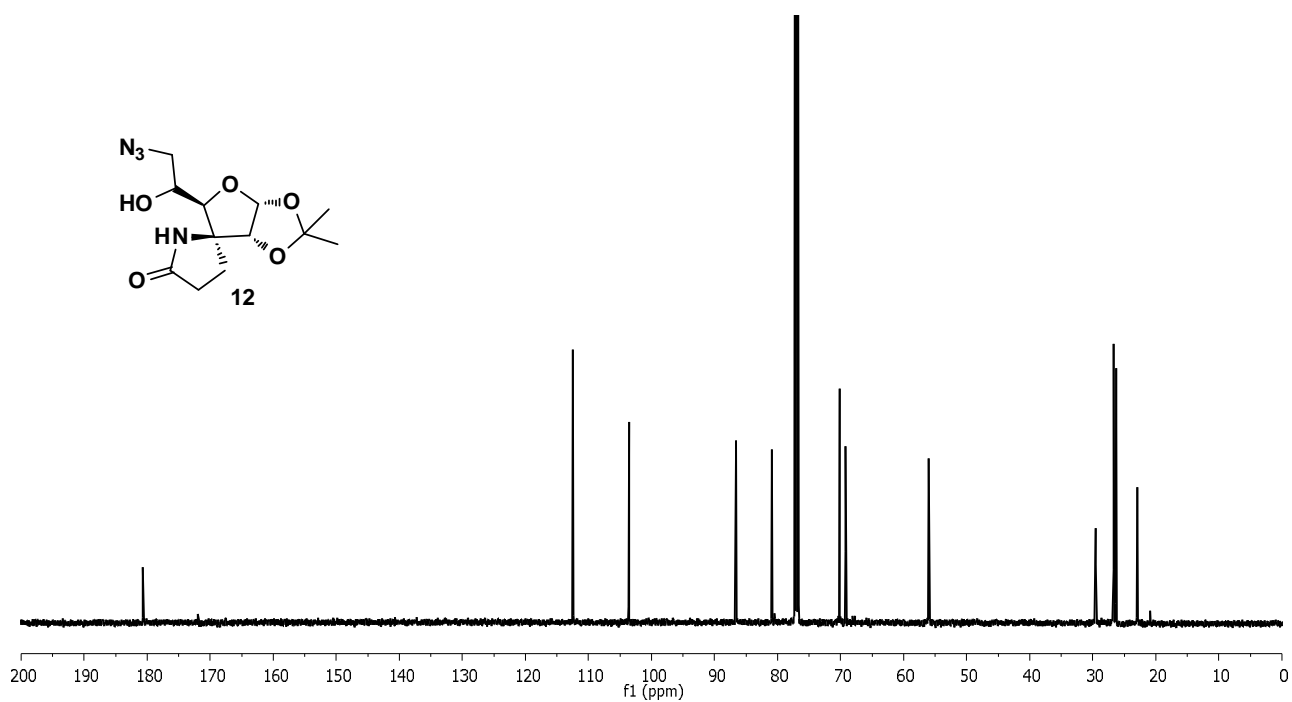

Figure 14: <sup>13</sup>C NMR (125 MHz, CDCl<sub>3</sub>) Spectrum of compound **12**

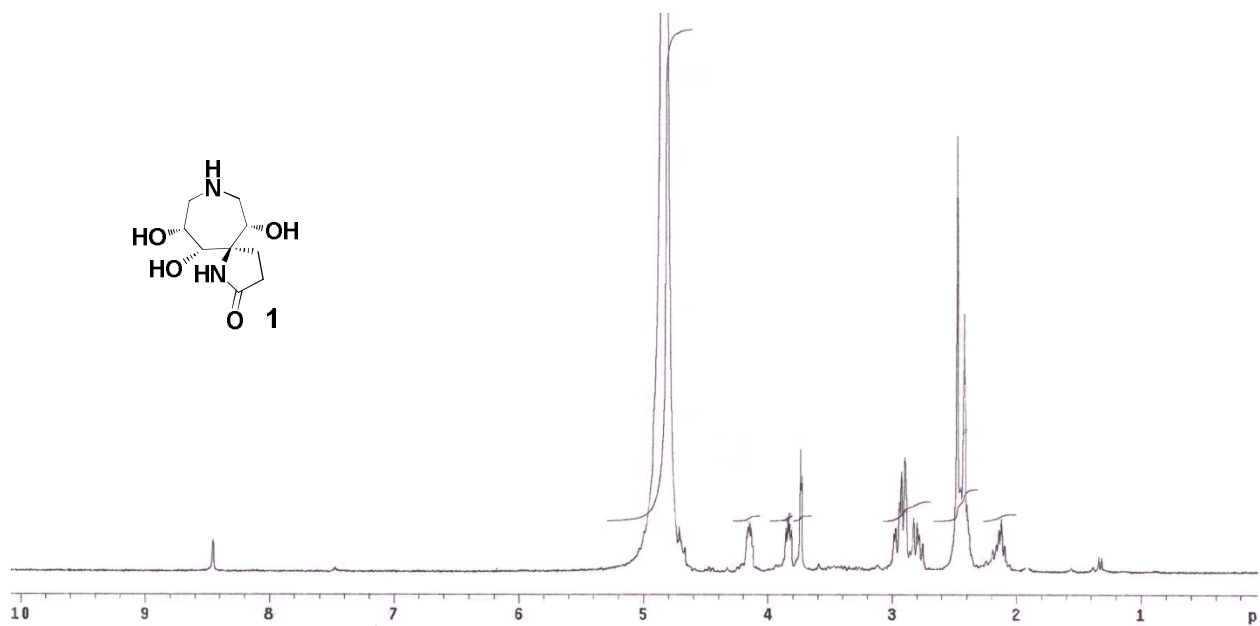

Figure 15:  $^1\text{H}$  NMR (300 MHz,  $\text{D}_2\text{O}$  Spectrum of compound **1**)

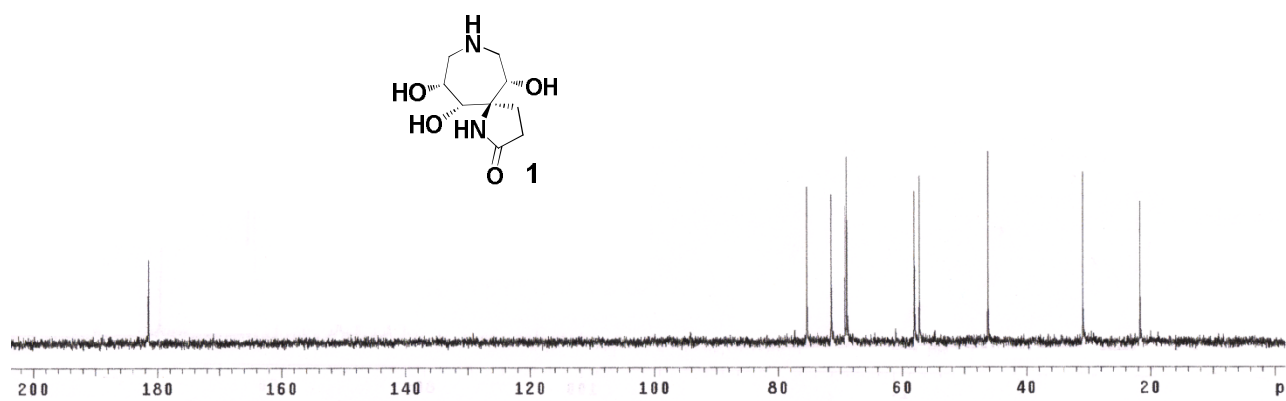

Figure 16:  $^{13}\text{C}$  NMR (125 MHz,  $\text{D}_2\text{O}$  Spectrum of compound **1**)

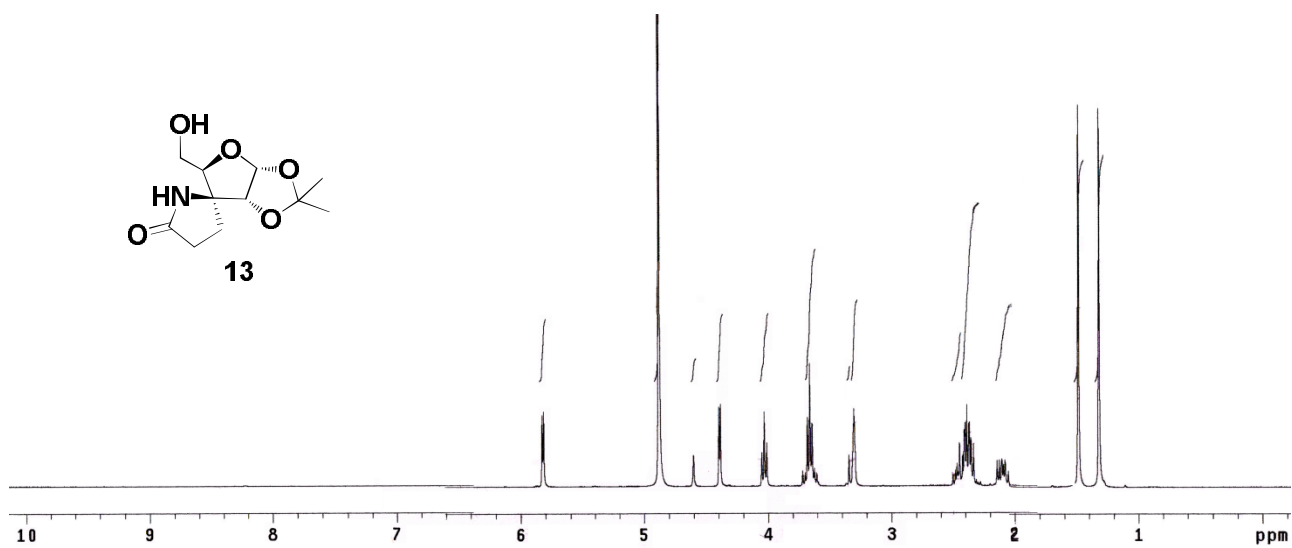

Figure 17:  $^1\text{H}$  NMR (300 MHz,  $\text{D}_2\text{O}+\text{DMSO}$  Spectrum of compound **13**)

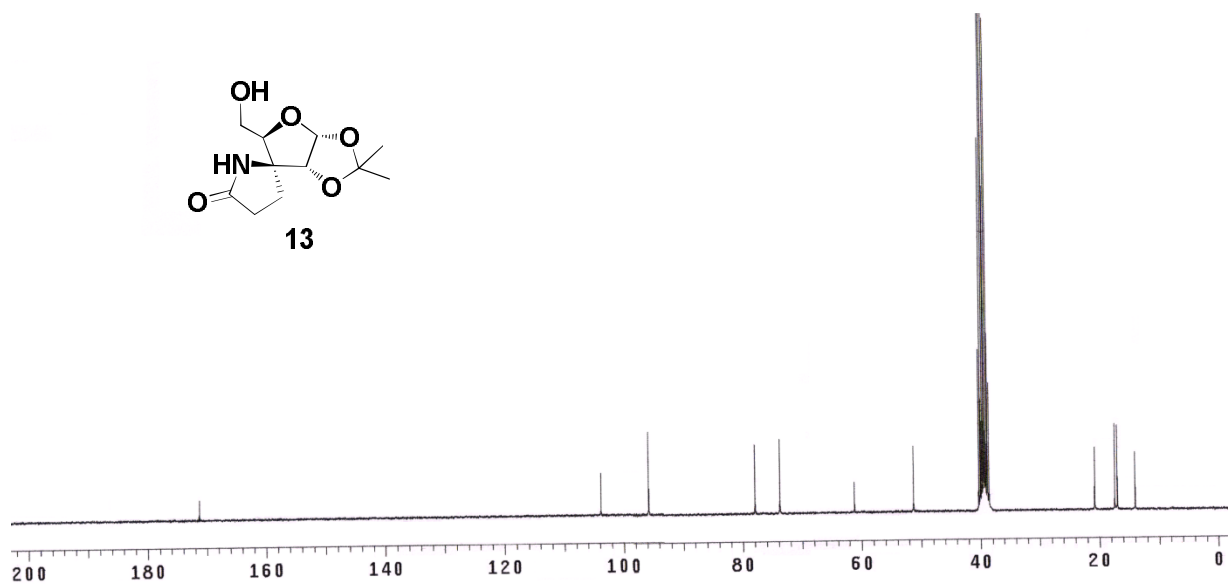

Figure 18:  $^{13}\text{C}$  NMR (75 MHz,  $\text{D}_2\text{O}+\text{DMSO}$  Spectrum of compound **13**)

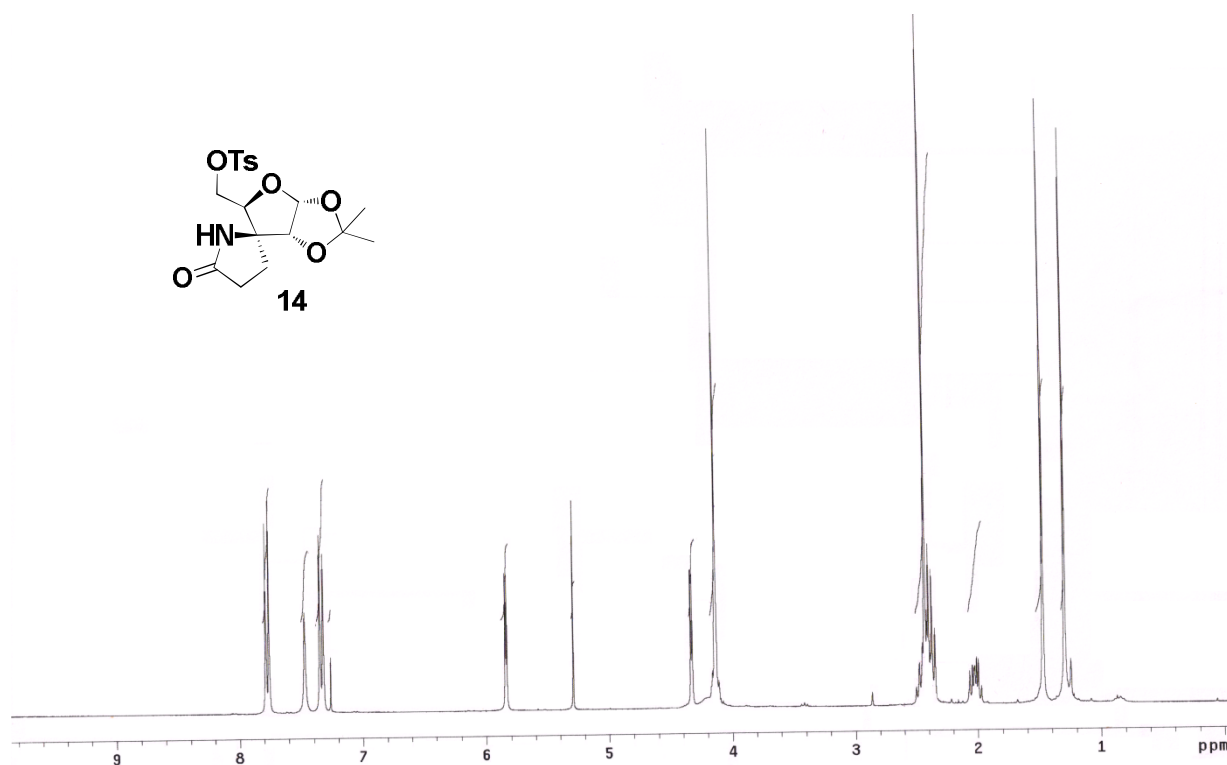

Figure 19:  $^1\text{H}$  NMR (300 MHz,  $\text{CDCl}_3$  Spectrum of compound **14**)

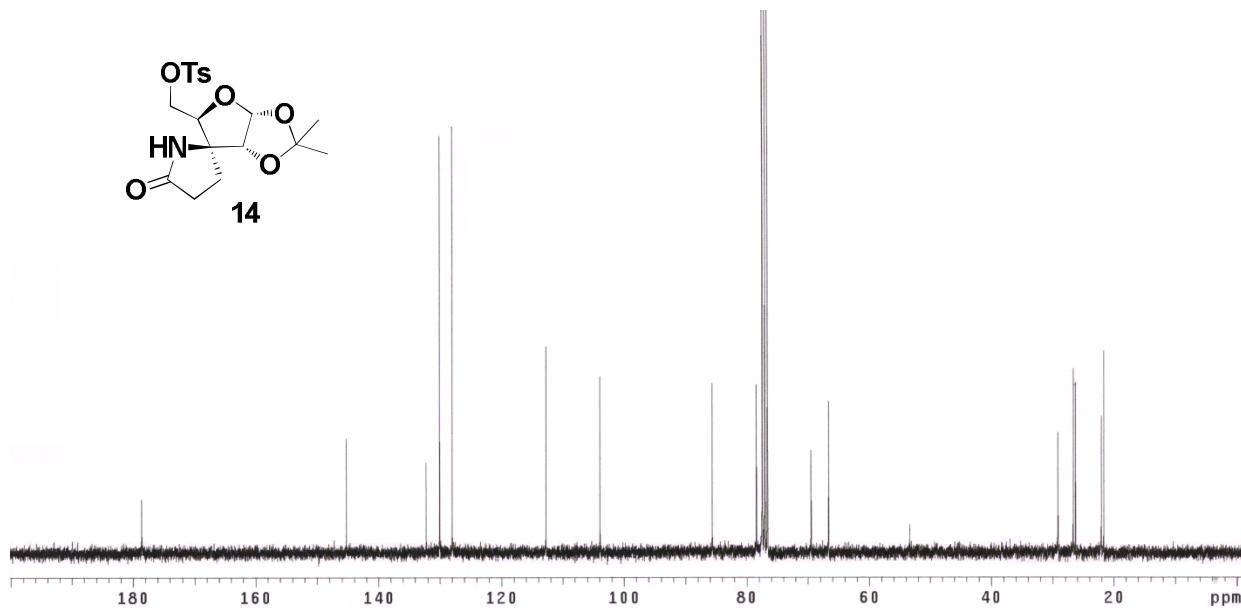

Figure 20:  $^{13}\text{C}$  NMR (75 MHz,  $\text{CDCl}_3$  Spectrum of compound **14**)

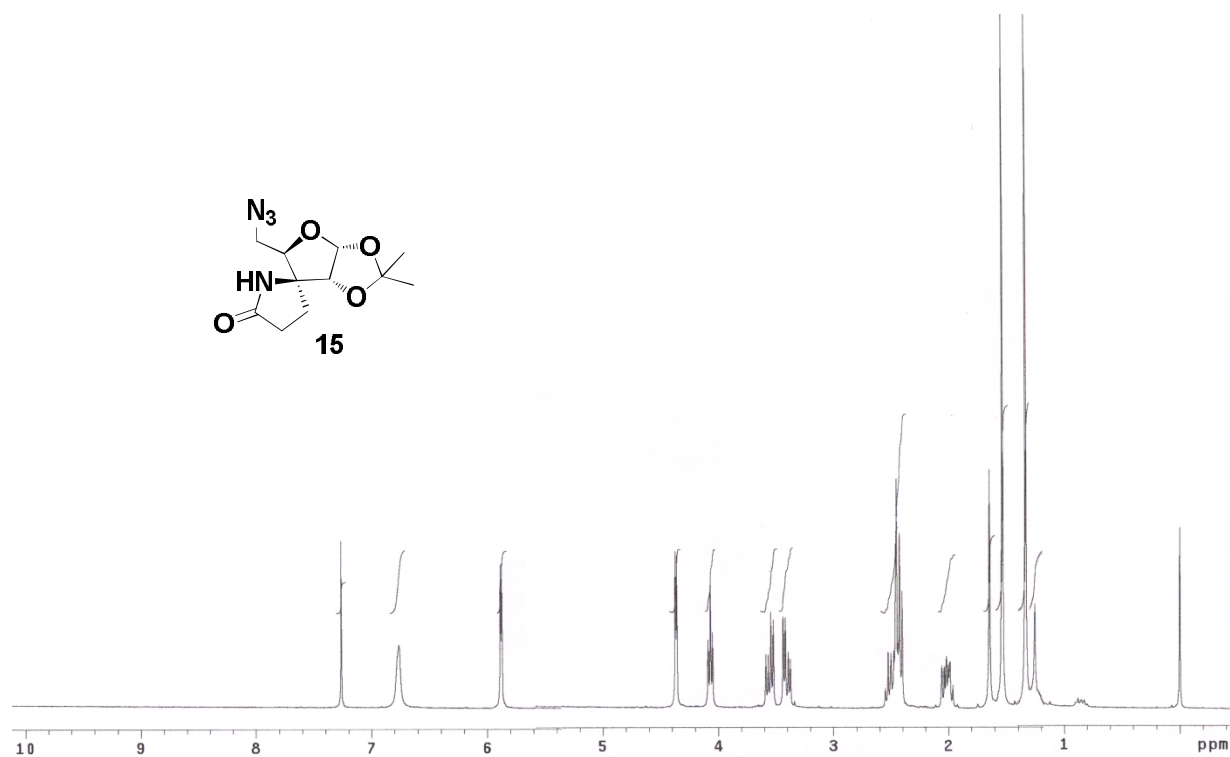

Figure 21:  $^1\text{H}$  NMR (300 MHz,  $\text{CDCl}_3$  Spectrum of compound **15**)

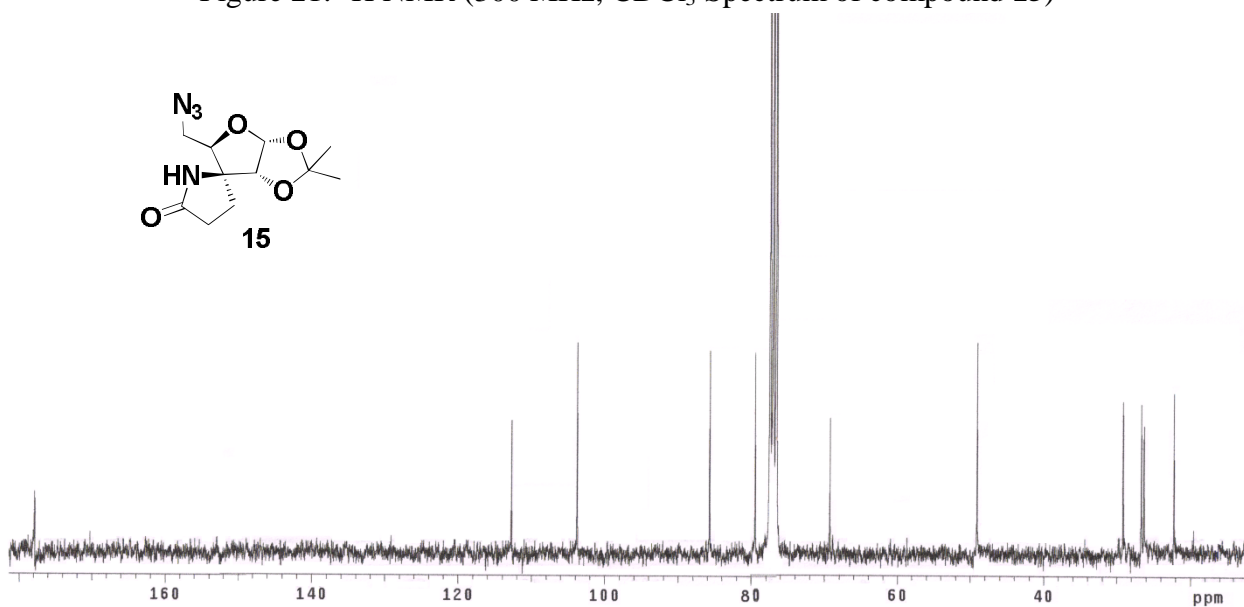

Figure 22:  $^{13}\text{C}$  NMR (75 MHz,  $\text{CDCl}_3$  Spectrum of compound **15**)

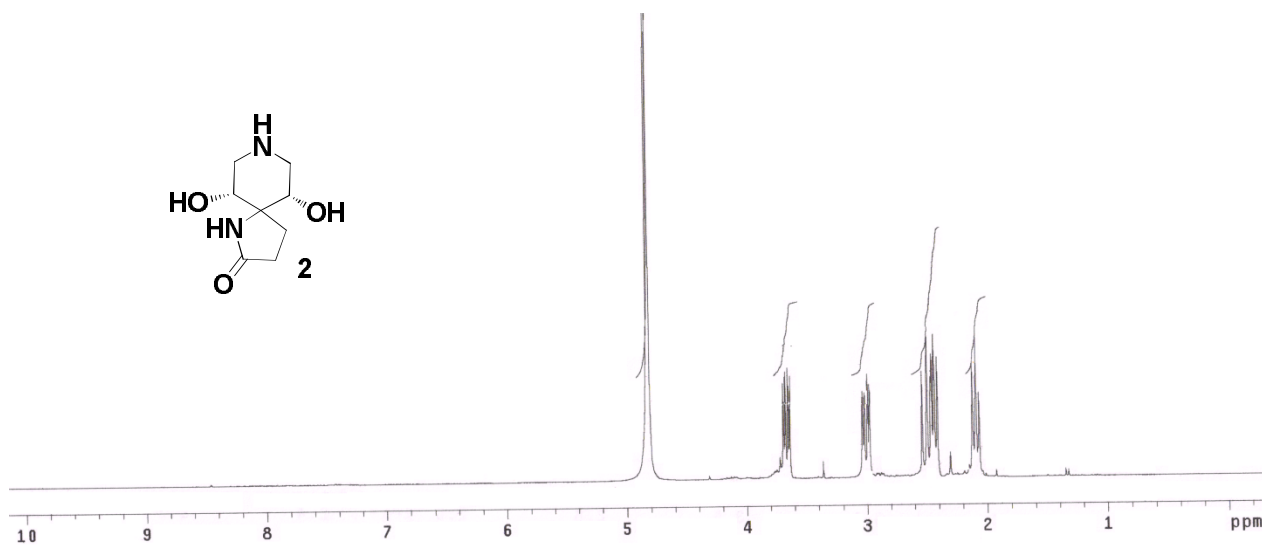

Figure 23:  $^1\text{H}$  NMR (300 MHz,  $\text{D}_2\text{O}$ ) Spectrum of compound **2**

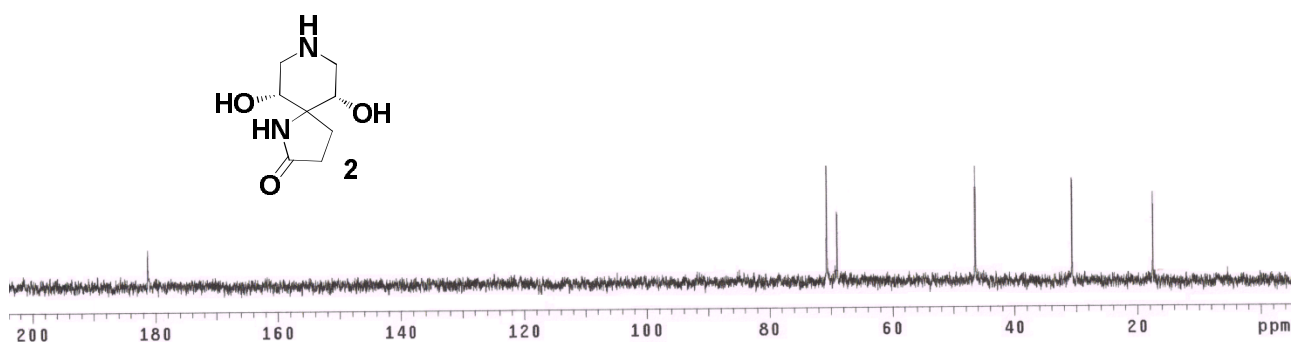

Figure 24:  $^{13}\text{C}$  NMR (75 MHz,  $\text{D}_2\text{O}$ ) Spectrum of compound **2**

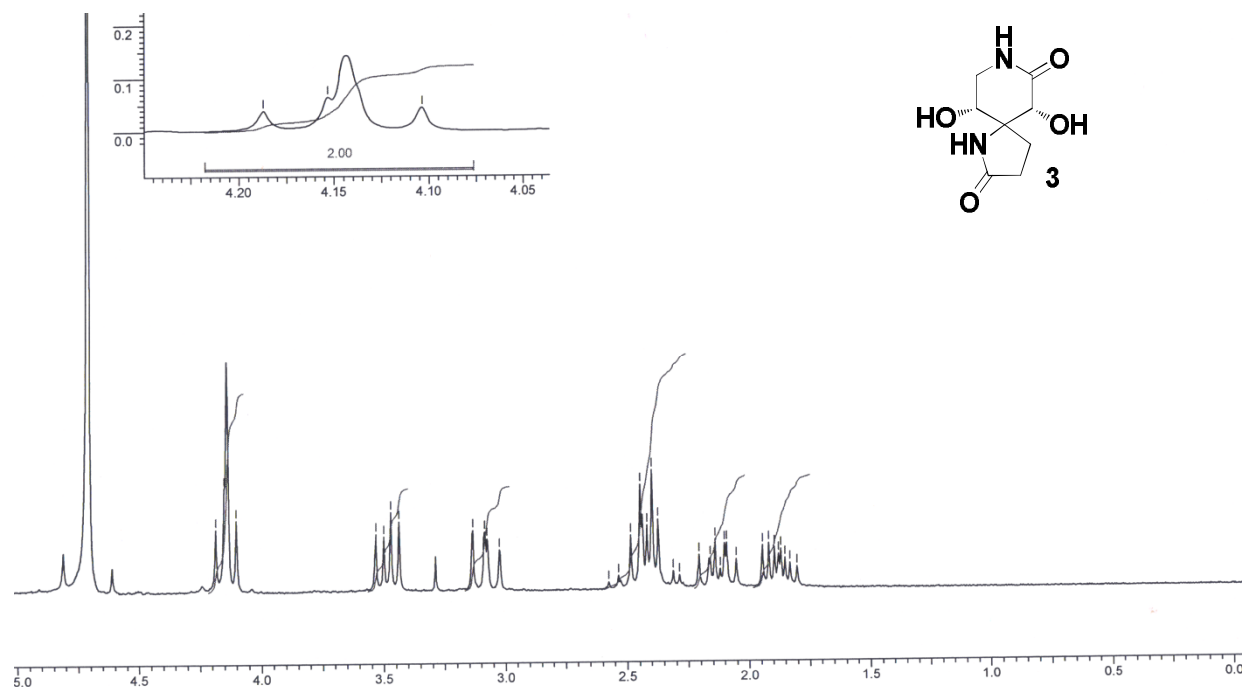

Figure 25:  $^1\text{H}$  NMR (200 MHz,  $\text{D}_2\text{O}$  Spectrum of compound **3**)

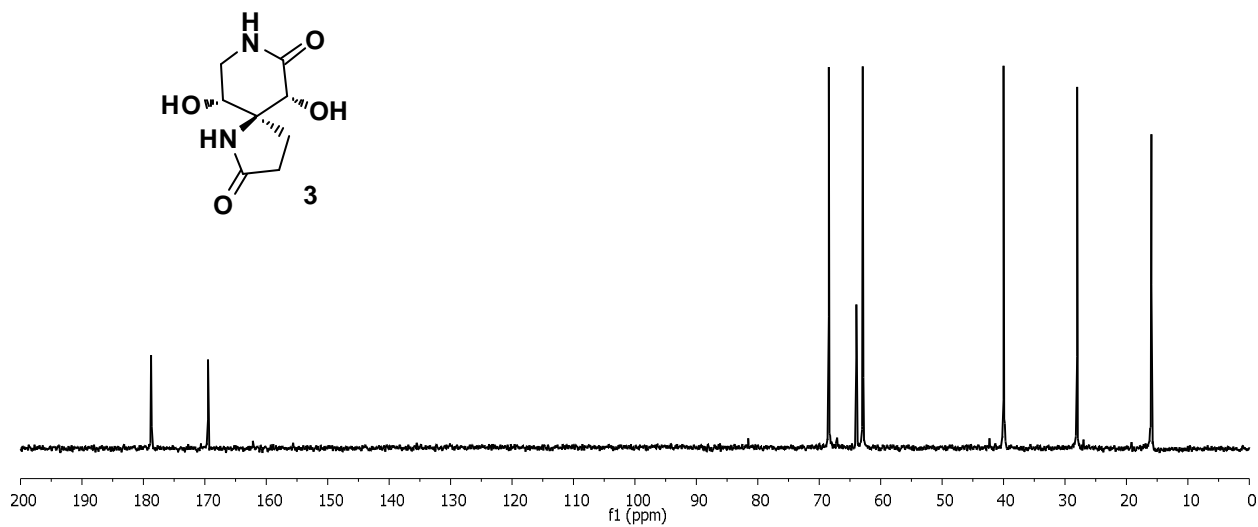

Figure 26:  $^{13}\text{C}$  NMR (75 MHz,  $\text{D}_2\text{O}$  Spectrum of compound **3**)

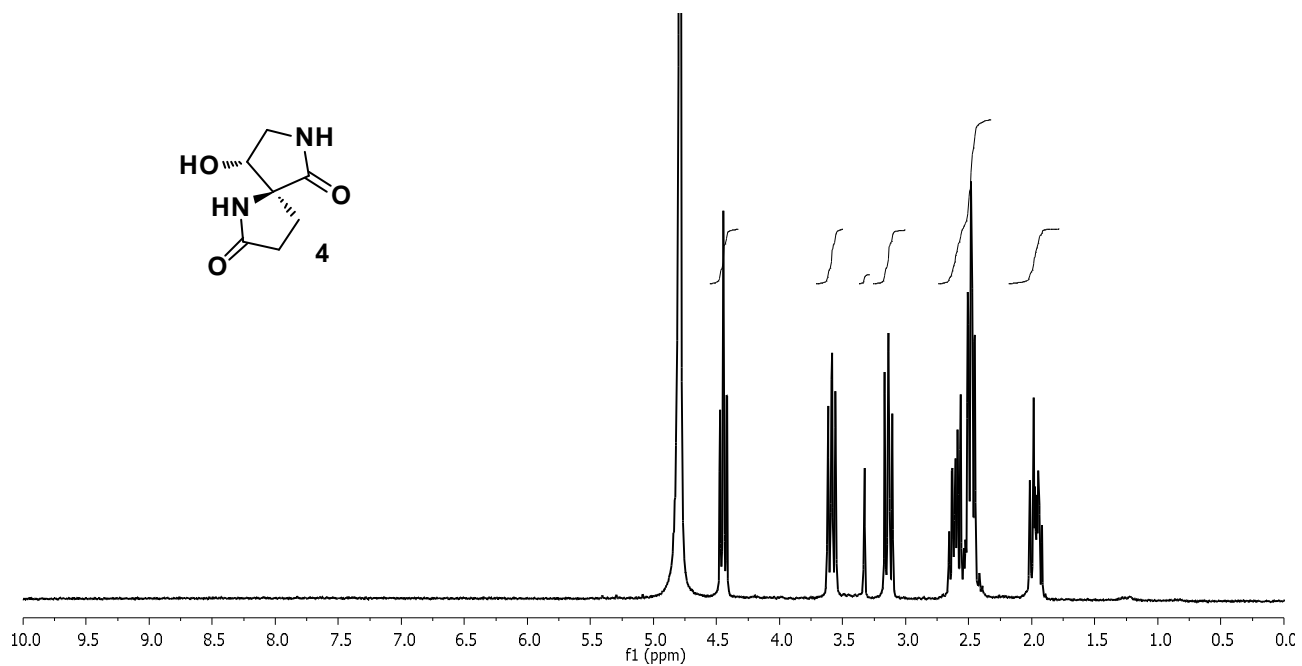

Figure 27:  $^1\text{H}$  NMR (500 MHz,  $\text{D}_2\text{O}$ ) Spectrum of compound **4**

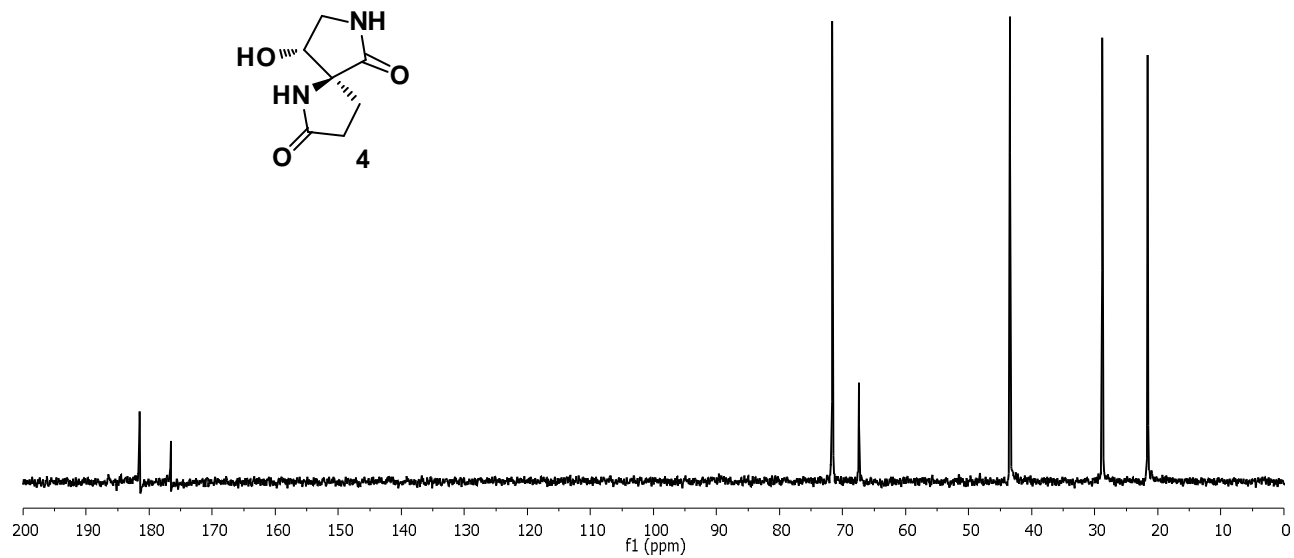

Figure 28:  $^{13}\text{C}$  NMR (125 MHz,  $\text{D}_2\text{O}$ ) Spectrum of compound **4**
